# Supplementary material for: Integrating Wearable Sensors and Video to Determine Microlocation-Specific Physiologic and Motion Biometrics-Method Development for Competitive Climbing
Source: MDPI journal article supplement (doi:10.3390/s22166271), 2022-08-20
Supplement: s1 [file s1]

Article

# Integrating Wearable Sensors and Video to Determine Microlocation-Specific Physiologic and Motion Biometrics-Method Development for Competitive Climbing

Miyuki Breen <sup>1,\*</sup>, Taylor Reed <sup>2,3</sup>, Hannah M. Breen <sup>2</sup>, Charles T. Osborne <sup>2,4</sup> and Michael S. Breen <sup>5</sup>

<sup>1</sup> Department of Mathematics, North Carolina State University, Raleigh, NC 27695, USA

<sup>2</sup> The Beta Angel Project, Alexandria, VA 22304, USA

<sup>3</sup> Sportrock Performance Institute, Alexandria, VA 22304, USA

<sup>4</sup> Department of Biomedical Engineering, The University of Utah, Salt Lake City, UT 84112, USA

<sup>5</sup> Department of Civil, Construction, and Environmental Engineering, North Carolina State University, Raleigh, NC 27695, USA

\* Correspondence: mbreen@ncsu.edu

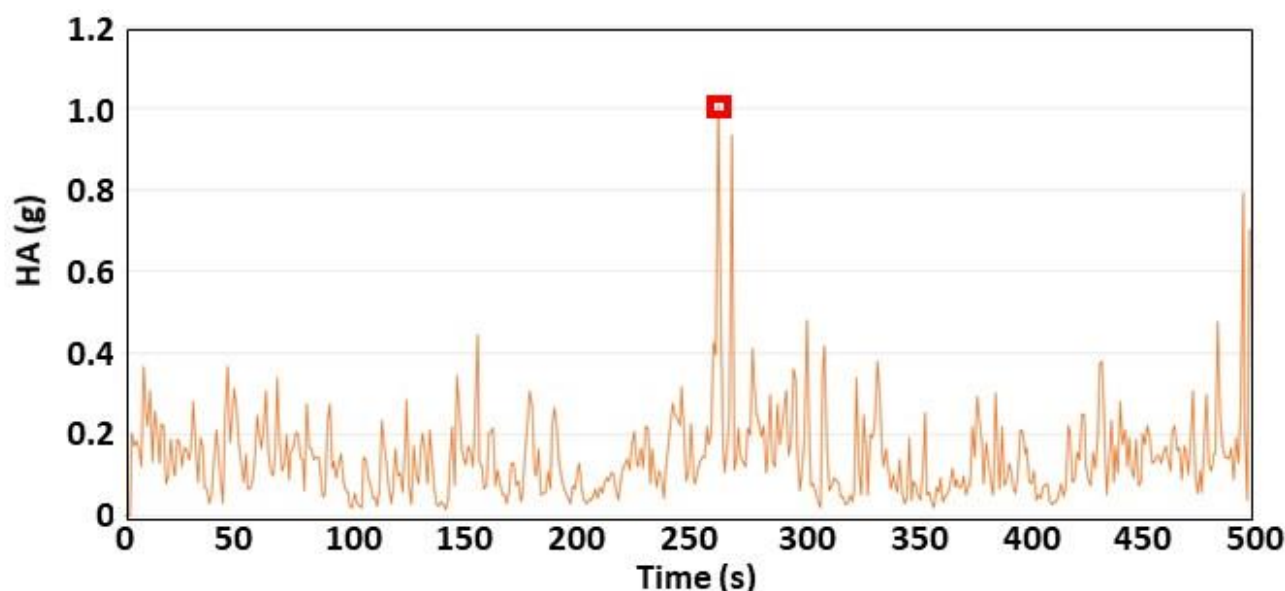

Figure S1. Hip acceleration (HA) during a lead climb with a fall. The red square indicates the time when the lead fall occurs and HA = 1.0 g.
